**TITLE:**

Variation in physiological function across source populations of a New Zealand freshwater snail

**AUTHORS:**

Emma S. Greimann<sup>1</sup>, Samuel Fahrner<sup>2</sup>, James D. Woodell<sup>1</sup>, Samantha K. Hennessey<sup>1</sup>, Michael R. Kline<sup>1</sup>, Jorge A. Moreno<sup>1</sup>, Madeline R. Peters<sup>1</sup>, Jennifer L. Cruise<sup>3</sup>, Maurine Neiman<sup>1</sup>, Joel Sharbrough<sup>1,4</sup>

<sup>1</sup> University of Iowa, Iowa City, IA, USA

<sup>2</sup> University of Minnesota, Saint Paul, MN, USA

<sup>3</sup> University of St. Thomas, Saint Paul, MN, USA

<sup>4</sup> Colorado State University, Fort Collins, CO, USA

**CORRESPONDING AUTHOR:**

Joel Sharbrough

[jsharbro@rams.colostate.edu](mailto:jsharbro@rams.colostate.edu)

Colorado State University

Fort Collins, CO 80523

**KEYWORDS:**

asexual reproduction, JC-1, mitochondria, oxygen consumption, *Potamopyrgus antipodarum*, sexual reproduction

1 **ABSTRACT**

2 The mitochondrial and nuclear-encoded genes responsible for cellular respiration are  
3 expected to experience relatively intense purifying selection, meaning that variation in  
4 these genes will often decrease fitness. Still, extensive variation for mitochondrial  
5 haplotype and function persists in natural populations. We integrated physiological,  
6 cellular, and behavioral approaches to quantify phenotypes relevant to mitochondrial  
7 function across a diverse sample of *Potamopyrgus antipodarum*, a New Zealand snail  
8 characterized by frequent coexistence between otherwise similar sexual and asexual  
9 individuals. We found extensive across-lake variation in organismal oxygen  
10 consumption and behavioral response to heat stress coupled with elevated  
11 mitochondrial membrane potential in males vs. females. These data set the stage for  
12 applying this important model system for sex, host-parasite interactions, invasion  
13 biology, and ecotoxicology to novel tests of the relationships between mitochondrial  
14 variation and performance in natural populations.

15

## 16 INTRODUCTION

17 Mitochondrial function is a critical component of eukaryotic function and fitness [1].  
18 Despite its importance, genes underlying oxidative phosphorylation are often  
19 polymorphic within species [1], which has important consequences for phenomena from  
20 mitonuclear incompatibilities [2] to DNA barcoding [3]. Indeed, extensive variation for  
21 mitochondrial function has been observed in a diverse array of species [4]. Although  
22 some variation in metabolic and mitochondrial traits has been linked to specific  
23 environmental correlates (e.g., altitude – [5], temperature – [6], energy source – [7]), we  
24 lack a systematic understanding of the distribution of this variation across biogeographic  
25 space.

26 Maternal transmission of mitochondrial genomes is expected to influence the  
27 distribution of phenotypic variation because only female-derived mutations are  
28 transmitted. This phenomenon has two primary consequences: 1) ~50% reduction in  $N_e$   
29 relative to biparentally inherited genomes, and 2) sexually antagonistic mutations only  
30 experience effective natural selection in females [8]. This latter phenomenon, the so-  
31 called “Mother’s Curse”, is predicted to result in the accumulation of mutations that are  
32 neutral or beneficial in females, but deleterious in males [9]. The lack of widespread  
33 evidence for Mother’s Curse (but see [10]) may point to mechanisms that prevent the  
34 spread of male-specific deleterious mutations in mitochondrial genomes [11, 12]. The  
35 extent to which Mother’s Curse shapes patterns of variation in mitochondrial function  
36 therefore represents yet another important unanswered question in evolutionary biology.

37 Because mitochondrial function requires compatibility between nuclear and  
38 mitochondrial gene products [13], reproductive mode can also dramatically impact the

39 evolution of variation in mitochondrial function because only sexual reproduction allows  
40 for the regular movement of mitochondrial genomes across diverse nuclear genomic  
41 backgrounds. Sexual reproduction between distantly related parents can give rise to  
42 hybrid offspring harboring mitonuclear incompatibilities [14]. On the other hand,  
43 inbreeding and asexual reproduction can reduce the efficacy of selection on  
44 mitochondrial genomes [15, 16]. While reduced mitochondrial function and organismal  
45 fitness in hybrid lineages is well documented [2], there are few empirical tests of  
46 whether and how inbreeding or asexuality affects mitochondrial function, leaving an  
47 important gap in our understanding of the evolutionary consequences of changes in  
48 reproductive mode. Surveys of mitochondrial genomes of asexual lineages [17, 18]  
49 have revealed elevated rates of accumulation of nonsynonymous mutations in  
50 mitochondrial genomes compared to sexual lineages. Determining whether these  
51 mutations actually result in reduced function will have profound implications for our  
52 understanding of the maintenance of sex.

53 *Potamopyrgus antipodarum*, a New Zealand freshwater snail [19], is ideally  
54 suited to answer these outstanding questions regarding mitochondrial function. There  
55 is both extensive mtDNA population structure in their native range [20] and evidence for  
56 local adaptation of snails to their source lakes [21, 22]. Temperature in particular  
57 appears to be a primary determinant of the geographical distribution of *P. antipodarum*  
58 within New Zealand [23]. Because asexuality has arisen multiple times within *P.*  
59 *antipodarum* [20, 24], and because sexual and asexual lineages frequently coexist in  
60 nature [24], asexual lineages can be treated as repeated “natural experiments” into the  
61 evolutionary consequences of asexuality.

62           Here, we tested whether lake of origin, reproductive mode, or sex affect  
63 mitochondrial and behavioral function under laboratory conditions in field-collected *P.*  
64 *antipodarum*.

65

## 66 **MATERIALS AND METHODS**

67 Because definitive determination of reproductive mode requires snail sacrifice, we  
68 sampled field-collected snails from lakes known to harbor sexual and asexual  
69 individuals, with populations at least ~10% male [24]. Upon arrival at the University of  
70 Iowa, snails were housed at 16°C on a 18hr light/6 hr dark schedule, and fed *Spirulina*  
71 algae 3x per week, as described in [25]. We arbitrarily selected adult snails from each  
72 lake collection and isolated each snail in a 0.5 L glass container with 300ml carbon-  
73 filtered H<sub>2</sub>O. Water was changed weekly. Assay sampling details (sample size, etc.) are  
74 summarized in Table 1. Reproductive mode was determined after assay completion,  
75 following the flow cytometry protocol outlined in [24].

76           We measured oxygen consumption as described in [25] for 57 wild-caught snails  
77 from each of six lakes at three different water temperatures: 16°C (not stressful, and  
78 similar to New Zealand lake temperatures), 22°C (moderately stressful), and 30°C  
79 (stressful) [25]. At each temperature, we assayed snails in a randomly determined order,  
80 and only snails that completed all temperature trials were included in analyses. Mean  
81 wet mass for each individual was calculated from the three separate temperature trials.

82           Righting behavior [25] and time to emergence following a startling stimulus (M  
83 Neiman pers. obs.) increase with temperature in *P. antipodarum*, indicating that both  
84 assays are effective proxies for heat stress. We quantified righting and emergence

85 times under each of the same three temperature treatments as for oxygen consumption  
86 in 46 wild-caught *P. antipodarum*.

87 JC-1 is a small, positively charged molecule that diffuses down the  
88 electrochemical gradient of the inner mitochondrial membrane and fluoresces green  
89 when dispersed and red when aggregated inside the mitochondrial matrix [26].

90 Therefore, the ratio of red: green fluorescence in freshly isolated mitochondria can  
91 serve as a proxy for mitochondrial membrane potential. We measured red: green ratios  
92 in JC-1-treated mitochondrial extracts from 46 wild-caught *P. antipodarum* as described  
93 in [25] using a Becton Dickenson LSR II flow cytometer.

94 We used a mixed-effects model framework to quantify the relationships between  
95 oxygen consumption and behavioral metrics with categorical variables for temperature  
96 (16° C, 22° C, 30° C), lake of origin (n = 3-6 depending on the analysis), reproductive  
97 mode (asexual, sexual), sex (male, female; only fit in models pertaining to behavior  
98 assays), and a continuous variable for mass (g; only fit in model pertaining to oxygen  
99 consumption). We modeled a term for snail identity as a random intercept to account for  
100 repeated measures on individuals across temperatures. Finally, we modeled  
101 mitochondrial membrane potential, measured as the ratio of red: green fluorescence, as  
102 a function of lake, reproductive mode, and sex using analysis of variance (ANOVA).

103 We developed final models using backwards selection until only predictors with  
104 *p*-values less than 0.05 remained. To test assumptions of normality and heteroscedacity  
105 of errors, we graphically inspected residuals and log- or square-root-transformed  
106 response variables when necessary. We performed all statistical analyses in R [27],  
107 fitting fixed-effect models with the *lm* function, fitting mixed-effects models using the

108 lme4 package [28], and estimating degrees of freedom for mixed-effect models using  
109 Satterthwaite's approximation via the lmerTest package [29].

110

## 111 **RESULTS**

112 All model-fitting results are detailed in Table 2. We found that temperature ( $p < 0.0001$ ),  
113 mass ( $p = 0.00154$ ), and lake of origin ( $p = 0.0072$ ), but not reproductive mode, were  
114 significantly associated with the rate of oxygen consumption (Figure 1a). Temperature  
115 was a significant predictor of both righting ability ( $p < 0.0001$ , Figure 1b) and emergence  
116 time ( $p < 0.0001$ , Figure 1c). Lake of origin was a significant predictor of righting ability  
117 ( $p = 0.0155$ ), but not of emergence time. Neither reproductive mode nor sex were  
118 significantly associated with behavioral responses to heat stress. Sex, but not lake of  
119 origin or reproductive mode, was a significant predictor of mitochondrial membrane  
120 potential ( $p = 0.0070$ , Figure 2), with higher mitochondrial membrane potential in males  
121 vs. females.

122

## 123 **DISCUSSION**

124 Here, we report the first evidence of population-structured variation for mitochondrial  
125 and behavioral function in *P. antipodarum*. Combined with population structure in  
126 mitochondrial genes [18, 20], this result suggests that mitochondrial function could be  
127 locally tuned in *P. antipodarum*. We also find that males have higher mitochondrial  
128 membrane potential than females. This result suggests that male *P. antipodarum* do not  
129 suffer from Mother's Curse, at least with respect to their ability to generate a proton  
130 motive force.

131           These data set the stage for future studies addressing multiple important  
132 evolutionary questions, including invasiveness, response to parasite infection,  
133 ecotoxicology, and the evolutionary maintenance of sex. Chief among these questions  
134 is whether and how asexuality might influence mitonuclear coevolution. While asexuality  
135 should reduce the efficacy of natural selection in both nuclear [30] and mitochondrial  
136 genomes [16, 31], stable transmission of mitonuclear genotypes may also facilitate  
137 rapid mitonuclear coadaptation and thereby local adaptation [32]. Importantly, the strong  
138 lake effect implies that extensive intrapopulation sampling is necessary for evaluating  
139 mitochondrial function in *P. antipodarum*.

140

#### 141 **ACKNOWLEDGEMENTS**

142 Flow cytometry was performed at UI's Flow Cytometry Facility. We thank Laura Bankers,  
143 Kaitlin Hatcher, Katelyn Larkin, and Kyle McElroy for snail collections.

144

#### 145 **DATA Availability**

146 Data to be archived on Dryad.

147

#### 148 **AUTHOR CONTRIBUTIONS**

149 ESG, JTS contributed to all aspects of study, SF to statistical analyses and manuscript  
150 drafting, JLC, MN to concept, statistical design, and manuscript drafting, and JDW, SKH,  
151 MRK, JAM, and MRP to data collection and manuscript editing.

152

#### 153 **FUNDING**



154 Work was supported by National Science Foundation (NSF: MCB – 1122176; DEB –  
155 1310825), Iowa Academy of Sciences (ISF #13-10), and Dewey Stuit Fund for  
156 Undergraduate Research.

157

## 158 **COMPETING INTERESTS**

159 We have no competing interests.

160

## 161 **ETHICAL STATEMENT**

162 Not applicable to mollusks.

163

**Table 1. Summary of source populations of *Potamopyrgus antipodarum*.**

| <b>Oxygen consumption assay</b>                                         |                            |               |                |             |               |  |
|-------------------------------------------------------------------------|----------------------------|---------------|----------------|-------------|---------------|--|
| <b>Lake</b>                                                             | <b>Latitude, Longitude</b> | <b>Sexual</b> | <b>Asexual</b> | <b>Male</b> | <b>Female</b> |  |
| Alexandrina                                                             | -43.900476, 170.453978     | 14            | 2              | -           | 16            |  |
| Clearwater                                                              | -43.602131, 171.043917     | -             | 4              | -           | 4             |  |
| Kaniere                                                                 | -42.832886, 171.14759      | 16            | -              | -           | 16            |  |
| Paringa                                                                 | -43.713068, 169.411348     | 5             | -              | -           | 5             |  |
| Rotoroa                                                                 | -41.855414, 172.637882     | -             | 17             | -           | 17            |  |
| Selfe                                                                   | -43.237765, 171.520449     | -             | 3              | -           | 3             |  |
| <b>Behavior and mitochondrial membrane potential assays<sup>1</sup></b> |                            |               |                |             |               |  |
| <b>Lake</b>                                                             | <b>Latitude, Longitude</b> | <b>Sexual</b> | <b>Asexual</b> | <b>Male</b> | <b>Female</b> |  |
| Alexandrina                                                             | -43.900476, 170.453978     | 3             | -              | 3           | -             |  |
| Ellery                                                                  | -44.046898, 168.654261     | 2             | 3              | -           | 5             |  |
| Kaniere                                                                 | -42.832886, 171.14759      | 5             | 1              | 4           | 2             |  |
| Mapourika                                                               | -43.315212, 170.204061     | 8             | 2              | 6           | 4             |  |
| Rotoroa                                                                 | -41.855414, 172.637882     | 4             | 1              | -           | 5             |  |
| Selfe                                                                   | -43.237765, 171.520449     | 9             | 8              | 9           | 8             |  |

<sup>1</sup> – Same individual snails were used in behavioral and mitochondrial membrane potential assays

164

**Table 2. Linear and mixed-effects models of select predictors on oxygen consumption, righting time, emergence time, and mitochondrial membrane potential.**

| <b>Oxygen consumption<sup>1</sup></b>               |                       |           |          |                                           |                                      |
|-----------------------------------------------------|-----------------------|-----------|----------|-------------------------------------------|--------------------------------------|
| <b>Factor</b>                                       | $\chi^2$              | <b>df</b> | <b>p</b> | <b>Non-significant predictors*</b>        |                                      |
| Intercept                                           | 2.700                 | 1         | 0.1004   |                                           |                                      |
| Temperature                                         | 39.038                | 2         | < 0.0001 | Reproductive Mode                         |                                      |
| Mass                                                | 11.061                | 1         | 0.0009   |                                           |                                      |
| Lake of Origin                                      | 15.280                | 5         | 0.0092   |                                           |                                      |
| <b>Factor<sup>s</sup></b>                           | $\chi^2$              | <b>df</b> | <b>p</b> | <b>Non-significant predictors*</b>        |                                      |
| Intercept                                           | 2.164                 | 1         | 0.141    |                                           |                                      |
| Temperature                                         | 27.336                | 2         | < 0.0001 | Reproductive Mode                         |                                      |
| Mass                                                | 4.365                 | 1         | 0.0367   |                                           |                                      |
| <b>Righting time<sup>2</sup></b>                    |                       |           |          |                                           |                                      |
| <b>Factor</b>                                       | $\chi^2$              | <b>df</b> | <b>p</b> | <b>Non-significant predictors*</b>        |                                      |
| Intercept                                           | 59.205                | 1         | < 0.0001 |                                           |                                      |
| Temperature                                         | 73.661                | 2         | < 0.0001 | Reproductive Mode, Sex                    |                                      |
| Lake of Origin                                      | 14.020                | 5         | 0.0155   |                                           |                                      |
| <b>Factor<sup>s</sup></b>                           | $\chi^2$              | <b>df</b> | <b>p</b> | <b>Non-significant predictors*</b>        |                                      |
| Intercept                                           | 94.767                | 1         | < 0.0001 |                                           |                                      |
| Temperature                                         | 69.655                | 2         | < 0.0001 | Reproductive Mode, Sex                    |                                      |
| Lake of Origin                                      | 13.429                | 4         | 0.0094   |                                           |                                      |
| <b>Factor<sup>t</sup></b>                           | $\chi^2$              | <b>df</b> | <b>p</b> | <b>Non-significant predictors*</b>        |                                      |
| Intercept                                           | 364.550               | 1         | < 0.0001 | Reproductive Mode, Sex,<br>Lake of Origin |                                      |
| Temperature                                         | 52.370                | 2         | < 0.0001 |                                           |                                      |
| <b>Emergence Time<sup>3</sup></b>                   |                       |           |          |                                           |                                      |
| <b>Factor</b>                                       | $\chi^2$              | <b>df</b> | <b>p</b> | <b>Non-significant predictors*</b>        |                                      |
| Intercept                                           | 448.891               | 1         | < 0.0001 | Reproductive Mode,<br>Sex, Lake of Origin |                                      |
| Temperature                                         | 46.646                | 2         | < 0.0001 |                                           |                                      |
| <b>Factor<sup>s</sup></b>                           | $\chi^2$              | <b>df</b> | <b>p</b> | <b>Non-significant predictors*</b>        |                                      |
| Intercept                                           | 363.860               | 1         | < 0.0001 | Sex, Reproductive Mode,<br>Lake of Origin |                                      |
| Temperature                                         | 34.608                | 2         | < 0.0001 |                                           |                                      |
| <b>Factor<sup>t</sup></b>                           | $\chi^2$              | <b>df</b> | <b>p</b> | <b>Non-significant predictors*</b>        |                                      |
| Intercept                                           | 59.205                | 1         | < 0.0001 |                                           |                                      |
| Temperature                                         | 73.661                | 2         | < 0.0001 | Reproductive Mode, Sex                    |                                      |
| Lake of Origin                                      | 14.020                | 5         | 0.0155   |                                           |                                      |
| <b>Mitochondrial membrane potential<sup>4</sup></b> |                       |           |          |                                           |                                      |
| <b>Factor</b>                                       | <b>Sum of Squares</b> | <b>df</b> | <b>F</b> | <b>p</b>                                  | <b>Non-significant predictors*</b>   |
| Intercept                                           | 55.876                | 1         | 305.1038 | < 0.0001                                  | Reproductive Mode,<br>Lake of Origin |
| Sex                                                 | 1.466                 | 1         | 8.0035   | 0.0070                                    |                                      |
| Residuals                                           | 8.058                 | 44        |          |                                           |                                      |

| <b>Factor<sup>§</sup></b> | <b>Sum of Squares</b> | <b>df</b> | <b>F</b> | <b>p</b> | <b>Non-significant predictors*</b>        |
|---------------------------|-----------------------|-----------|----------|----------|-------------------------------------------|
| Intercept                 | 55.876                | 1         | 329.344  | < 0.0001 | Reproductive Mode,<br>Lake of Origin      |
| Sex                       | 1.026                 | 1         | 6.046    | 0.0183   |                                           |
| Residuals                 | 6.956                 | 41        |          |          |                                           |
| <b>Factor<sup>†</sup></b> | <b>Sum of Squares</b> | <b>df</b> | <b>F</b> | <b>p</b> | <b>Non-significant predictors*</b>        |
| Intercept                 | 96.564                | 1         | 482.37   | < 0.0001 | Reproductive Mode, Lake of<br>Origin, Sex |
| Residuals                 | 6.406                 | 32        |          |          |                                           |

<sup>1</sup> – Type III Repeated-Measures Analysis of Deviance  $\chi^2$  Test of O<sub>2</sub> consumption per hour

<sup>2</sup> – Type III Repeated-Measures Analysis of Deviance  $\chi^2$  Test of log-transformed righting times

<sup>3</sup> – Type III Repeated-Measures Analysis of Deviance  $\chi^2$  Test of square-root-transformed emergence times

<sup>4</sup> – Type III Analysis of Variance *F* Test of log-transformed ratios of red: green in mitochondrial extracts

\* – Non-significant predictors listed in order of elimination from the model

§ – Model fit only included lakes from which both sexual and asexual snails were assayed

† – Model fit only included lakes from which both male and female snails were assayed

166 **FIGURE LEGENDS**

167 **Figure 1. Physiological responses to heat stress for *P. antipodarum* across**

168 **source lakes. a) Oxygen consumption/hour/gram. b) Righting time. c) Emergence time**

169

170 **Figure 2. Mitochondrial membrane potential in field-collected *P. antipodarum*.**

171 Ratios of red: green fluorescence of JC-1-treated mitochondrial extracts for a) snails

172 from all six New Zealand lakes, b) male vs. female snails from all lakes, and c) male vs.

173 female snails from three New Zealand lakes with replication for sex.

174

175 **REFERENCES**

- 176 [1] Dowling, D.K., Friberg, U. & Lindell, J. 2008 Evolutionary implications of non-neutral  
177 mitochondrial genetic variation. *Trends Ecol Evol* **23**, 546-554.
- 178 [2] Sloan, D.B., Havird, J.C. & Sharbrough, J. 2017 The on-again, off-again relationship  
179 between mitochondrial genomes and species boundaries. *Mol Ecol* **26**, 2212-2236.
- 180 [3] Hebert, P.D., Ratnasingham, S. & deWaard, J.R. 2003 Barcoding animal life:  
181 cytochrome c oxidase subunit 1 divergences among closely related species. *Proc Roy*  
182 *Soc Lond B* **270 Suppl 1**, S96-99.
- 183 [4] Dobler, R., Rogell, B., Budar, F. & Dowling, D.K. 2014 A meta-analysis of the  
184 strength and nature of cytoplasmic genetic effects. *J Evol Biol* **27**, 2021-2034.
- 185 [5] Simonson, T.S., Yang, Y.Z., Huff, C.D., Yun, H.X., Qin, G., Witherspoon, D.J., Bai,  
186 Z.Z., Lorenzo, F.R., Xing, J.C., Jorde, L.B., et al. 2010 Genetic evidence for high-  
187 altitude adaptation in Tibet. *Science* **329**, 72-75.
- 188 [6] Clarke, A. & Johnston, N.M. 1999 Scaling of metabolic rate with body mass and  
189 temperature in teleost fish. *J Anim Ecol* **68**, 893-905.
- 190 [7] Montooth, K.L., Marden, J.H. & Clark, A.G. 2003 Mapping determinants of variation  
191 in energy metabolism, respiration and flight in *Drosophila*. *Genetics* **165**, 623-635.
- 192 [8] Frank, S.A. & Hurst, L.D. 1996 Mitochondria and male disease. *Nature* **383**, 224-224.
- 193 [9] Camus, M.F., Clancy, D.J. & Dowling, D.K. 2012 Mitochondria, maternal inheritance,  
194 and male aging. *Curr Biol* **22**, 1717-1721.

- 195 [10] Innocenti, P., Morrow, E.H. & Dowling, D.K. 2011 Experimental evidence supports  
196 a sex-specific selective sieve in mitochondrial genome evolution. *Science* **332**, 845-848.
- 197 [11] Kuijper, B., Lane, N. & Pomiankowski, A. 2015 Can paternal leakage maintain  
198 sexually antagonistic polymorphism in the cytoplasm? *J Evol Biol* **28**, 468-480.
- 199 [12] Wade, M.J. & Brandvain, Y. 2009 Reversing Mother's Curse: selection on male  
200 mitochondrial fitness effects. *Evolution* **63**, 1084-1089.
- 201 [13] Rand, D.M. 2001 The units of selection on mitochondrial DNA. *Annu Rev Ecol Syst*  
202 **32**, 415-448.
- 203 [14] Burton, R.S., Pereira, R.J. & Barreto, F.S. 2013 Cytonuclear genomic interactions  
204 and hybrid breakdown. *Annu Rev Ecol Evol Syst* **44**, 281-302.
- 205 [15] Wright, S.I., Ness, R.W., Foxe, J.P. & Barrett, S.C.H. 2008 Genomic consequences  
206 of outcrossing and selfing in plants. *Int J Plant Sci* **169**, 105-118.
- 207 [16] Neiman, M. & Taylor, D.R. 2009 The causes of mutation accumulation in  
208 mitochondrial genomes. *Proc Roy Soc Lond B* **276**, 1201-1209.
- 209 [17] Henry, L., Schwander, T. & Crespi, B.J. 2012 Deleterious mutation accumulation in  
210 asexual *Timema* stick insects. *Mol Biol Evol* **29**, 401-408.
- 211 [18] Neiman, M., Hehman, G., Miller, J.T., Logsdon, J.M., Jr. & Taylor, D.R. 2010  
212 Accelerated mutation accumulation in asexual lineages of a freshwater snail. *Mol Biol*  
213 *Evol* **27**, 954-963.

- 214 [19] Winterbourn, M. 1970 Population studies on the new zealand freshwater gastropod,  
215 *Potamopyrgus antipodarum* (Gray). *J Mollus Stud* **39**, 139-149.
- 216 [20] Neiman, M. & Lively, C.M. 2004 Pleistocene glaciation is implicated in the  
217 phylogeographical structure of *Potamopyrgus antipodarum*, a New Zealand snail. *Mol*  
218 *Ecol* **13**, 3085-3098.
- 219 [21] Krist, A.C., Bankers, L., Larkin, K., Larson, M.D., Greenwood, D.J., Dyck, M.A. &  
220 Neiman, M. 2017 Phosphorus availability in the source population influences response  
221 to dietary phosphorus quantity in a New Zealand freshwater snail. *Oecologia*. **185**, 596-  
222 605.
- 223 [22] Lively, C.M. & Jokela, J. 1996 Clinal variation for local adaptation in a host-parasite  
224 interaction. *Proc Roy Soc Lond B* **263**, 891-897.
- 225 [23] Winterbourn, M. 1969 Water temperature as a factor limiting the distribution of  
226 *Potamopyrgus antipodum* (Gastropoda - Prosobranchia) in the New Zealand thermal  
227 region. *NZ J Mar Fresh* **3**, 453-458.
- 228 [24] Neiman, M., Paczesniak, D., Soper, D.M., Baldwin, A.T. & Hehman, G. 2011 Wide  
229 variation in ploidy level and genome size in a New Zealand freshwater snail with  
230 coexisting sexual and asexual lineages. *Evolution* **65**, 3202-3216.
- 231 [25] Sharbrough, J., Cruise, J.L., Beetch, M., Enright, N.M., & Neiman, M. 2017 Genetic  
232 variation for mitochondrial function in the New Zealand freshwater snail *Potamopyrgus*  
233 *antipodarum*. *J Hered* **108**, 759-768.



- 234 [26] Garner, D.L. & Thomas, C.A. 1999 Organelle-specific probe JC-1 identifies  
235 membrane potential differences in the mitochondrial function of bovine sperm. *Mol*  
236 *Reprod Devel* **53**, 222-229.
- 237 [27] Team, R.C. 2017 R: A language and environment for statistical computing [Internet].  
238 Vienna, Austria; 2014.
- 239 [28] Bates, D., Sarkar, D., Bates, M.D. & Matrix, L. 2007 The lme4 package. *R package*  
240 *version 2*, 74.
- 241 [29] Kuznetsova, A., Brockhoff, P.B. & Christensen, R.H.B. 2015 Package 'lmerTest'. *R*  
242 *package version 2*.
- 243 [30] Charlesworth, B. 2012 The effects of deleterious mutations on evolution at linked  
244 sites. *Genetics* **190**, 5-22.
- 245 [31] Gabriel, W., Lynch, M. & Burger, R. 1993 Muller's Ratchet and Mutational  
246 Meltdowns. *Evolution* **47**, 1744-1757.
- 247 [32] Neiman, M. & Linksvayer, T.A. 2006 The conversion of variance and the  
248 evolutionary potential of restricted recombination. *Heredity* **96**, 111-121.  
249

**a)**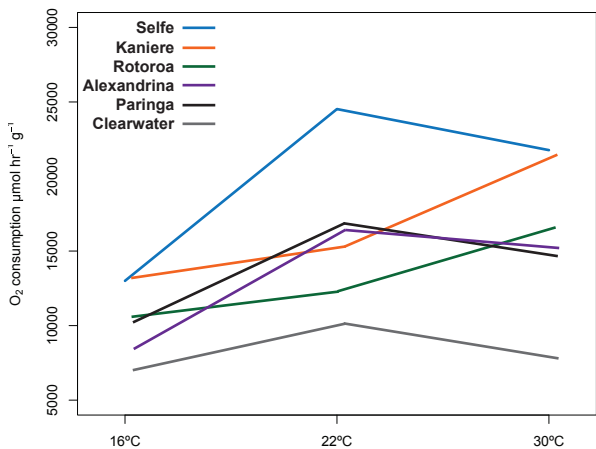**b)**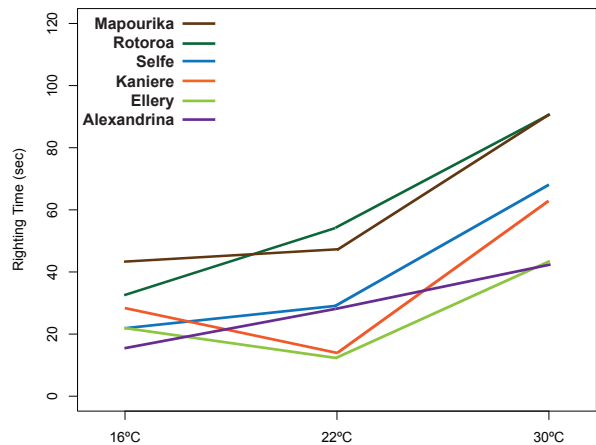**c)**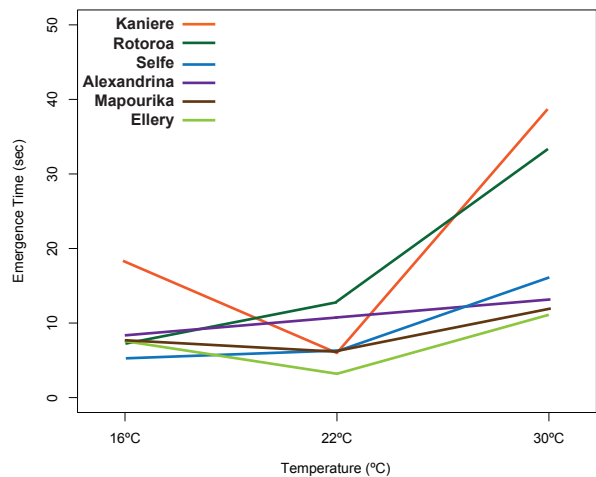

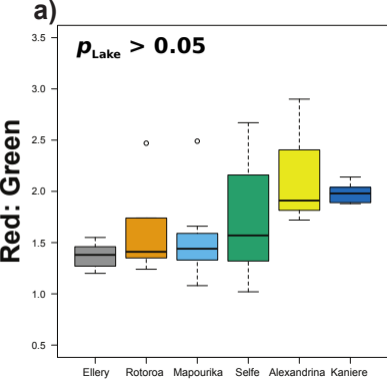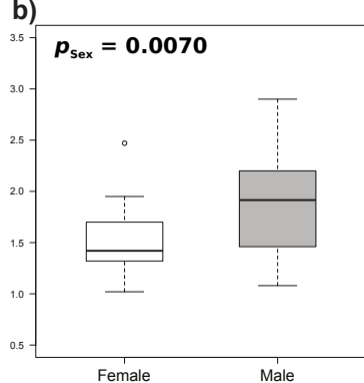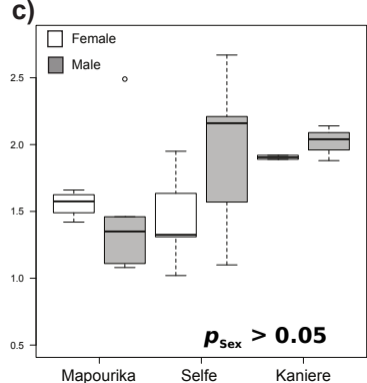

Source: https://www.biorxiv.org/content/10.1101/230979v1.full.pdf
